# Supplementary material for: Detection of Spatial Shift in Flood Regime of the Kabul River Basin in Pakistan, Causes, Challenges, and Opportunities
Source: MDPI journal article supplement (doi:10.3390/w13091276), 2021-04-30
Supplement: s1 [file s1]

# Methods

## 1.1 Trend Analysis

The details on the trend analysis method along with corresponding mathematical equations are presented here.

$$Z = \begin{cases} \frac{S-1}{\sqrt{V(S)}} & \text{for } S > 0 \\ 0 & \text{for } S = 0 \\ \frac{S+1}{\sqrt{V(S)}} & \text{for } S < 0 \end{cases} \quad (1)$$

$$S = \sum_{i=1}^{n-1} \sum_{j=i+1}^n \text{sgn}(x_j - x_i) \quad (2)$$

$$\text{sgn}(x_j - x_i) = \begin{cases} 1 & \text{for } (x_j - x_i) > 0 \\ 0 & \text{for } (x_j - x_i) = 0 \\ -1 & \text{for } (x_j - x_i) < 0 \end{cases} \quad (3)$$

$$V(S) = \frac{1}{18} \left[ n(n-1)(2n+5) - \sum_{p=1}^q t_p(t_p-1)(2t_p+5) \right] \quad (4)$$

Where  $q$  represents total number of tied groups. A set of same values in a dataset is referred as a tied group. Each tied group is denoted by  $t_p$ . The positive values of  $Z$  indicate upward (increasing) trends in time series, and the negative values show downward (decreasing) trends. Trends are then tested against some critical values ( $Z_{1-\alpha}$ ) to show that either they are statistically significant or not. For example, if  $|Z| > Z_{1-\alpha}$ , (e.g.,  $Z_{1-\alpha}$  at  $\alpha = 0.05$ ); the null hypothesis of no-trend is rejected, and alternative hypothesis of significant trend is accepted.

Sen's slope (SS) is calculated as below:

$$SS = \text{median} \left[ \frac{x_j - x_i}{j - i} \right] \quad \text{for all } i < j \quad (5)$$

Where  $x_i$  is the value of data at time step  $i$  and  $x_j$  at time step  $j$ .

## 1.2 Change point detection for flood time series

### Pettitt's test

Pettitt's test (Pettitt 1979) is a nonparametric way to identify the occurrence of a change point in time series data. It has been commonly used to detect changes in hydrological and meteorological time series data. It is rank-based and distribution-free test for detecting an abrupt change when the exact time of the change is unknown for a data series. The Pettit test can be mathematically described as follows,

$$U_{t,n} = \sum_{j=1}^t \sum_{i=1}^n \text{sgn}(x_j - x_i), \quad (t = 1, \dots, n), \quad (1)$$

Where the  $U_{t,n}$  represents the change point year. It was used to detect the change point year in the time series of different flood indicators to study the flood regime in the KRB, Pakistan.

### Buishand's Range Test (Buishand 1982)

The adjusted partial sum ( $S_k$ ), that is the cumulative deviation from mean for  $k^{\text{th}}$  observation of a series  $x_1, x_2, x_3, \dots, x_k, \dots, x_n$  with mean ( $\bar{x}$ ) can be computed using following equation:

$$S_k = \sum_{i=1}^K (x_i - \bar{x}) \quad (2)$$

A series may be homogeneous without any change point if  $S_k \approx 0$ , because in random series, the deviation from mean will be distributed on both sides of the mean of the series. The significance of shift can be evaluated by computing rescaled adjusted range (R) using the following equation:

$$R = \frac{\text{Max}(S_k) - \text{Min}(S_k)}{\bar{x}} \quad (3)$$

The computed value of  $R/\sqrt{n}$  is compared with critical values given by (Buishand 1982, Wijngaard, Klein Tank et al. 2003) has been used for detection of possible change .

### Standard Normal Homogeneity (SNH) Test

The test statistic ( $T_k$ ) is used to compare the mean of first  $n$  observations with the mean of the remaining  $(n-k)$  observations with  $n$  data points (Štěpánek, Zahradníček et al. 2009, Vezzoli, Pecora et al. 2012).

$$T_k = KZ_1^2 + (n - k)Z_2^2 \quad (4)$$

$Z_1$  and  $Z_2$  can be computed as:

$$Z_1 = \frac{1}{K} \sum_{i=1}^K \frac{(x_i - \bar{x})}{\sigma_x} \quad (5)$$

$$Z_2 = \frac{1}{n-K} \sum_{i=K+1}^n \frac{(x_i - \bar{x})}{\sigma_x} \quad (6)$$

where,  $\bar{x}$  and  $\sigma_x$  are the mean and standard deviation of the series. The year  $k$  can be considered as change point and consist a break where the value of  $T_k$  attains the maximum value. To reject the null hypothesis, the test statistic should be greater than the critical value, which depends on the sample size ( $n$ ) given in Table S3

## Tables

**Table S1.** Basic characteristics of soil data in the KRB, Pakistan.

| Symbol | HWSD-Soil Group | Texture | Top Soil Texture Class |       |       |         |
|--------|-----------------|---------|------------------------|-------|-------|---------|
|        |                 |         | %sand                  | %Silt | %clay | %Gravel |
| I      | Lithosols       | Medium  | 43                     | 34    | 23    | 26      |
| Be     | Cambisols       | Medium  | 42                     | 36    | 22    | 9       |
| Xh     | Haplic Xerosols | Medium  | 39                     | 40    | 21    | 4       |
| GG     | Gleysols        | Medium  | 0                      | 0     | 0     | 0       |

**Table S2.** Description of land use re-classes and original classes.

| Re-Classes  | Original Classes                                                                                                                                                                                                                 |
|-------------|----------------------------------------------------------------------------------------------------------------------------------------------------------------------------------------------------------------------------------|
| Forest      | Tree cover, broadleaved, evergreen, closed to open (>15%)                                                                                                                                                                        |
|             | Tree cover, broadleaved, deciduous, closed to open (>15%), Tree or shrub cover, Tree cover, broadleaved, deciduous, closed (>40%)                                                                                                |
|             | Tree cover, broadleaved, deciduous, open (15-40%)                                                                                                                                                                                |
|             | Tree cover, needle leaved, evergreen, closed to open (>15%)                                                                                                                                                                      |
|             | Tree cover, needle leaved, evergreen, closed (>40%)                                                                                                                                                                              |
|             | Tree cover, needle leaved, evergreen, open (15-40%)                                                                                                                                                                              |
|             | Tree cover, needle leaved, deciduous, closed to open (>15%)                                                                                                                                                                      |
|             | Tree cover, needle leaved, deciduous, closed (>40%)                                                                                                                                                                              |
|             | Tree cover, needle leaved, deciduous, open (15-40%)                                                                                                                                                                              |
|             | Tree cover, mixed leaf type (broadleaved and needle leaved)                                                                                                                                                                      |
| Urban Areas | Mosaic tree and shrub (>50%) / herbaceous cover (<50%)                                                                                                                                                                           |
|             | Sparse tree (<15%), 160 Tree cover, flooded, fresh or brackish water                                                                                                                                                             |
| Urban Areas | Tree cover, flooded, saline water                                                                                                                                                                                                |
|             | Urban areas                                                                                                                                                                                                                      |
| Grassland   | Herbaceous cover, Mosaic natural vegetation (tree, shrub, herbaceous cover) (>50%) / cropland (<50%), Mosaic herbaceous cover (>50%) / tree and shrub (<50%), Shrub land, Evergreen shrub land, Deciduous shrub land, Grassland, |
|             | Sparse vegetation (tree, shrub, herbaceous cover) (<15%)                                                                                                                                                                         |
|             | Sparse shrub (<15%), Sparse herbaceous cover (<15%)                                                                                                                                                                              |
|             | Shrub or herbaceous cover, flooded, fresh/saline/brackish water                                                                                                                                                                  |
| Agriculture | Cropland, rain fed, Cropland, irrigated or post-flooding                                                                                                                                                                         |
|             | Mosaic cropland (>50%) / natural vegetation (tree, shrub, herbaceous cover) (<50%)                                                                                                                                               |
| Water Body  | Water bodies                                                                                                                                                                                                                     |
| Snow Cover  | Permanent snow and ice                                                                                                                                                                                                           |
| Bare Areas  | Bare areas, Consolidated bare areas, Unconsolidated bare areas                                                                                                                                                                   |

**Table S3.** Critical values of test statistics for different change point detection tests.

| Number of observation | Critical values for test statistic at different significance level |     |       |      |                                      |      |
|-----------------------|--------------------------------------------------------------------|-----|-------|------|--------------------------------------|------|
|                       | Pettit Test                                                        |     | SNHT  |      | Buishand Range test ( $R/\sqrt{n}$ ) |      |
|                       | 1%                                                                 | 5%  | 1%    | 5%   | 1%                                   | 5%   |
| 20                    | 71                                                                 | 57  | 9.56  | 6.95 | 1.6                                  | 1.43 |
| 30                    | 133                                                                | 107 | 10.45 | 7.65 | 1.7                                  | 1.5  |
| 40                    | 208                                                                | 167 | 11.01 | 8.1  | 1.74                                 | 1.53 |
| 50                    | 293                                                                | 235 | 11.38 | 8.45 | 1.78                                 | 1.55 |
| 70                    | 488                                                                | 393 | 11.89 | 8.8  | 1.81                                 | 1.59 |
| 100                   | 841                                                                | 677 | 12.32 | 9.15 | 1.86                                 | 1.62 |

## Results

**Table S4.** Optimized parameters for HEC-HMS model (6-hourly scale).

| Parameters                                         | Sub-basin/Reach | Lower Bound | Upper Bound |
|----------------------------------------------------|-----------------|-------------|-------------|
| Initial abstraction(mm)                            | 19 sub-basins   | 9.27        | 13.95       |
| Lag time(minutes)                                  | 19 sub-basins   | 35.64       | 3341.6      |
| Initial discharge ( $\text{m}^3 \text{sec}^{-1}$ ) | 19 sub-basins   | 80          | 80          |
| Recession constant                                 | 19 sub-basins   | 0.65        | 0.8         |
| Ratio to peak                                      | 19 sub-basins   | 0.38        | 0.43        |
| Muskingum K                                        | 9 Reaches       | 0.11        | 13.7        |
| Muskingum X                                        | 9 Reaches       | 0.25        | 0.46        |
