# Supplementary material for: Detection of Spatial Shift in Flood Regime of the Kabul River Basin in Pakistan, Causes, Challenges, and Opportunities
Source: MDPI journal article supplement (doi:10.3390/w13091276), 2021-04-30
Supplement: s1 [file s1]

Archive with 1 entries (1 files):
- water-1077814-SI.pdf
